# Supplementary material
Source: HighWire-hosted journal article supplement (https://jnm.snmjournals.org/highwire/filestream/94780/field_highwire_adjunct_files/0/154807_Supplemental_Data.pdf)
Supplement: 154807_Supplemental_Data.pdf [file 154807_Supplemental_Data.pdf]

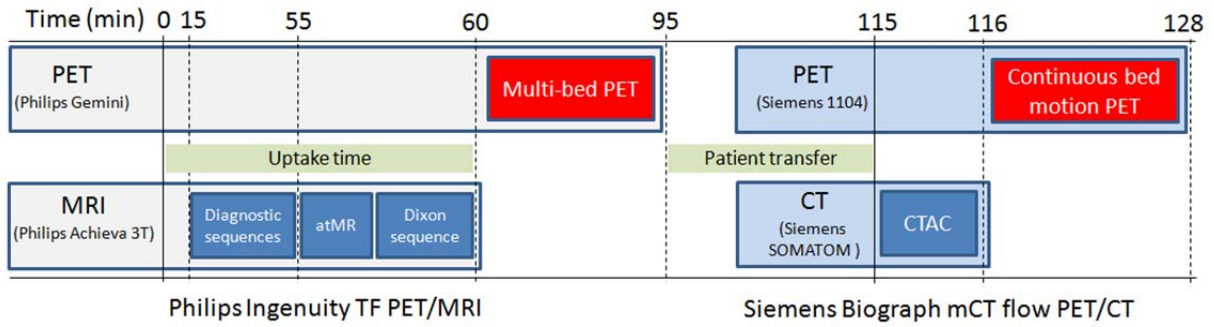

**SUPPLEMENTAL FIGURE 1.** Diagram of the data acquisition protocol for PET/MRI and complementary PET/CT scans. During the uptake period, the patients undergo various diagnostic MRI scans (40-min) followed by a Dixon and Philips atMR sequences (about 2.5 min each), the latter being used for attenuation correction of the PET data. A 30 min whole-body PET scan is then followed. After the patient transfer time of 10-20 min, a head and neck complementary PET/CT scan is acquired for about 13 min.

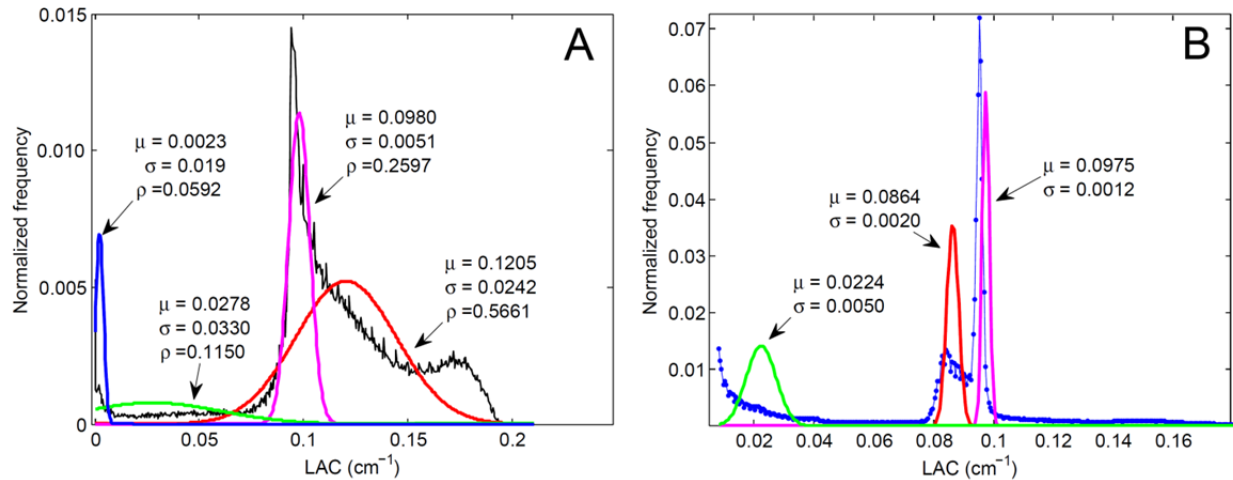

**SUPPLEMENTAL FIGURE 2.** (A) The estimated mean ( $\mu$ ), standard deviation ( $\sigma$ ), and mixture proportion ( $\rho$ ) parameters of the Gaussian mixture model used in this work. The parameters were obtained from 10 whole-body CTAC maps (5 males and 5 females) using an expectation maximization algorithm. (B) The uni-modal Gaussians used for the known fat, non-fat soft and lung tissue classes are overlaid on the histogram of attenuation coefficients of a single patient dataset. Note that in this study, we set the means of uni-modal Gaussians to those of tissue attenuation coefficients used in the standard 4-class MRI-guided attenuation correction.

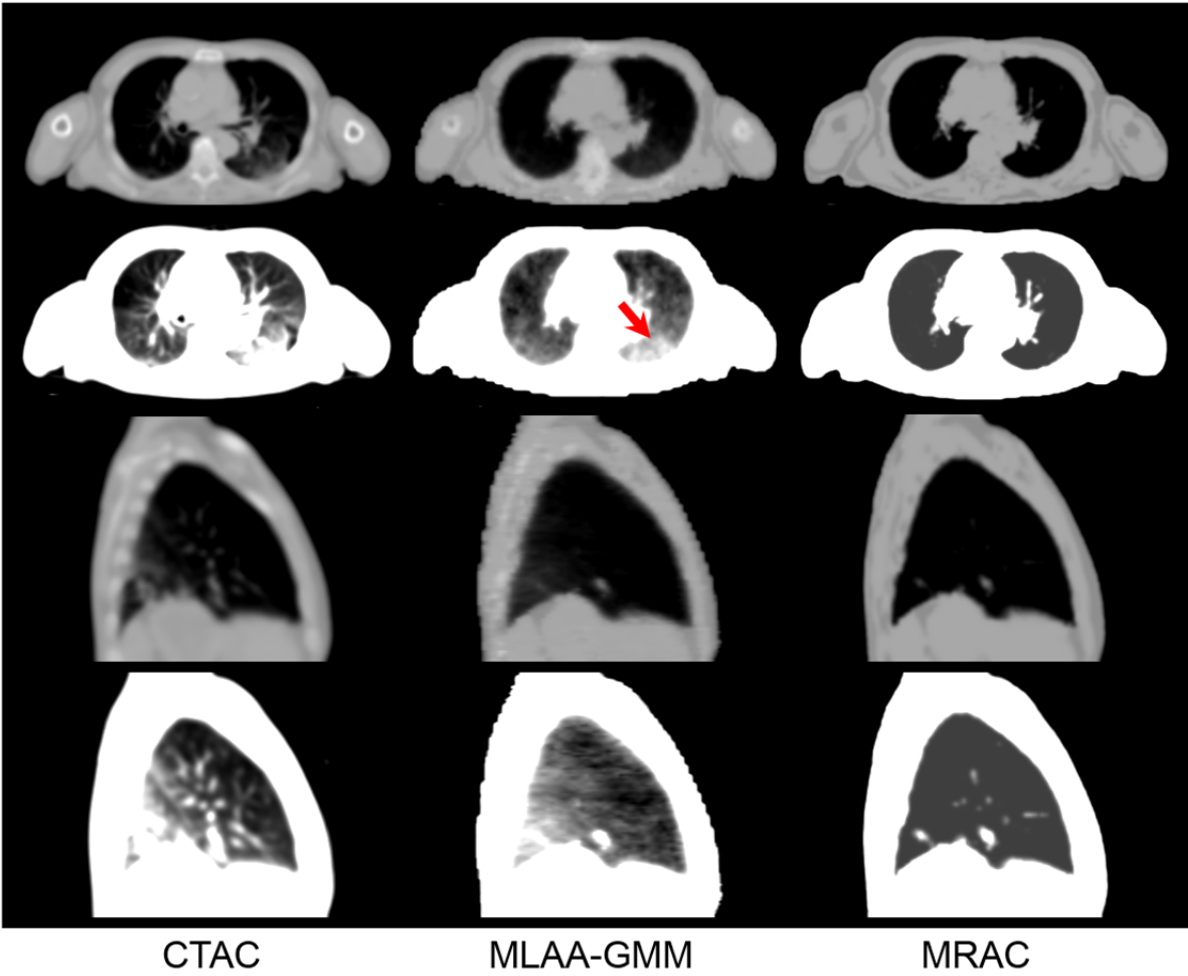

**SUPPLEMENTAL FIGURE 3.** Comparison of attenuation maps produced by the standard 4-class MRI-based method (MRAC) and the MLLA algorithm with the reference CTAC maps in two different displaying windows. Note the improvement brought by the MLLA approach.
